# Supplementary material for: Functional Connectivity Alterations in Epilepsy from Resting-State Functional MRI
Source: PLoS One. 2015 Aug 7;10(8):e0134944. doi: 10.1371/journal.pone.0134944 (PMC4529140; doi:10.1371/journal.pone.0134944)
Supplement: S3 Table — (DOCX) [file pone.0134944.s003.docx]

**S3 Table: Classification accuracy with consistent neuroimaging marker identification method by variation in number of selected connections.** The number of selected connections is varied from 50 to 1,000 and the classification performance is studied.

| Number of connections | Prediction accuracy | Specificity (mean) | Sensitivity (mean) |
| --- | --- | --- | --- |
|  |  |  |  |
|  |  |  |  |
|  |  |  |  |
|  |  |  |  |
|  |  |  |  |
|  |  |  |  |
|  |  |  |  |
|  |  |  |  |
|  |  |  |  |
|  |  |  |  |
|  |  |  |  |
|  |  |  |  |
|  |  |  |  |
|  |  |  |  |
|  |  |  |  |
|  |  |  |  |
|  |  |  |  |
|  |  |  |  |
|  |  |  |  |
|  |  |  |  |

For this experiment, 50% dataset is used for training and rest 50% for testing over 100 trials. It can be seen that the best accuracy is achieved with 450 connections.
